# Supplementary material for: Genetic Evaluation of Inpatient Neonatal and Infantile Congenital Heart Defects: New Findings and Review of the Literature
Source: MDPI journal article supplement (doi:10.3390/genes12081244), 2021-08-14
Supplement: s1 [file s1]

**Supplemental Table 1.** CMA findings and features in patients assessed at a low likelihood of abnormal CMA

| CHD Class   | Abnormal (n) | CMA Findings                                                              | Dysmorphic Features                                                                                                              |
|-------------|--------------|---------------------------------------------------------------------------|----------------------------------------------------------------------------------------------------------------------------------|
| APVR        | 1            | 15q11.2 deletion (BP1-BP2)                                                | None                                                                                                                             |
| AVSD        | 0            |                                                                           |                                                                                                                                  |
| Complex     | 3            | 22q11.2 duplication                                                       | No features noted on exam                                                                                                        |
|             |              | 22q11.2 deletion                                                          | No features noted on exam                                                                                                        |
|             |              | Xp22.31 deletion                                                          | No features noted on exam                                                                                                        |
| Conotruncal | 3            | 22q11.2 deletion                                                          | No features noted on exam, but increased chance of the disorder because of the conotruncal CHD                                   |
|             |              | 22q11.2 deletion                                                          | No features noted on exam, but general concern for a syndrome because of the CHD plus imperforate anus                           |
|             |              | Xq28 deletion (BRCC3, familial moyamoya)                                  | Specific syndrome not noted on exam, but some minor anomalies (slightly low-set ears, bitemporal widening of the skull)          |
| Heterotaxy  | 2            | 11p15.4 deletion (HBB globin cluster, carrier for beta-thalassemia)       | No features noted on exam                                                                                                        |
|             |              | 16p13.11 duplication (including MYH11)                                    | No features noted on exam                                                                                                        |
| LVOTO       | 10           | 7q11.23 duplication                                                       | Specific syndrome not noted on exam, but there was presence of: mild hypospadias, sacral dimple, and large first toes            |
|             |              | 8p23.1 duplication                                                        | Non-dysmorphic                                                                                                                   |
|             |              | 8p23.1 duplication                                                        | Specific syndrome not noted on exam, but nevus flammeus on upper eyelids and nose                                                |
|             |              | 15q11.2 deletion (BP1-BP2) (x2)                                           | No features noted on exam                                                                                                        |
|             |              | 15q11.2 deletion (BP1-BP2)/1p12 duplication (of NOTCH2)                   | No features noted on exam                                                                                                        |
|             |              | 16p11.2 duplication                                                       | Specific syndrome not recognized, but case was noted to have mild frontal bossing                                                |
|             |              | 17p12 deletion (of PMP22)                                                 | No features noted on exam                                                                                                        |
|             |              | 22q11.2 duplication                                                       | No features noted on exam                                                                                                        |
|             |              | Mosaic Turner syndrome                                                    | No features noted on exam                                                                                                        |
| RVOTO       | 3            | 8p23.1 deletion                                                           | Specific syndrome not noted on exam, but slight webbing of neck                                                                  |
|             |              | 16p11.2 duplication                                                       | Specific syndrome not noted on exam, but case had slightly posteriorly rotated ears                                              |
|             |              | Hypertelorism, cranial molding, prominent occiput, overfolded ear helices | Abnormal appearing female genitalia with left-sided enlargement of the labia and unclear vaginal opening (?rectovaginal fistula) |
| Septal      | 0            |                                                                           |                                                                                                                                  |

APVR, anomalous pulmonary venous return; AVSD, atrioventricular septal defect; LVOTO, left ventricular outflow tract obstructive defect; RVOTO, right ventricular outflow tract obstructive defect

**Supplemental Table 2.** CMA findings and features in patients assessed at a high likelihood of abnormal CMA

| CHD Class   | Abnormal (n) | CMA Findings                                     | Dysmorphic Features                                                                                                                                                                                                                                                                                                                                                                                                                                                                                                                 | ECAs                                                                                         |
|-------------|--------------|--------------------------------------------------|-------------------------------------------------------------------------------------------------------------------------------------------------------------------------------------------------------------------------------------------------------------------------------------------------------------------------------------------------------------------------------------------------------------------------------------------------------------------------------------------------------------------------------------|----------------------------------------------------------------------------------------------|
| APVR        | 0            |                                                  |                                                                                                                                                                                                                                                                                                                                                                                                                                                                                                                                     |                                                                                              |
| AVSD        | 2            | 10 Mb duplication 5p13.2-p11                     | Mildly macrocephalic, posteriorly-rotated and low-set ears, preauricular pit, large and slightly protruding tongue, redundant mucosal tissue on perianal skin, small umbilical hernia, small shallow sacral dimple, slight hypotonia possibly c/w sedation, weak suck                                                                                                                                                                                                                                                               | Macrocephaly                                                                                 |
|             |              | Trisomy 21                                       | Facial features c/w trisomy 21 (almond-shaped eyes, short nose, upslanting palpebral fissures)                                                                                                                                                                                                                                                                                                                                                                                                                                      | Duodenal atresia                                                                             |
| Complex     | 3            | Recombinant chromosome 8 syndrome                | None                                                                                                                                                                                                                                                                                                                                                                                                                                                                                                                                | Communicating hydrocephalus, myelomeningocele                                                |
|             |              | 22q11.2 deletion                                 | Brachycephaly, reverse epicanthal folds, dysplastic ears, prominent nasolabial folds, mild laterally displaced nipples, mild hypotonia                                                                                                                                                                                                                                                                                                                                                                                              |                                                                                              |
|             |              | 2q22.1-q23.3 deletion (Mowat-Wilson syndrome)    | Wide nasal bridge, short philtrum, ears with upturned/creased lobes, low-set ears, bridged palmar crease, clenched fists, mild-moderate abdominal distension                                                                                                                                                                                                                                                                                                                                                                        |                                                                                              |
| Conotruncal | 19           | 22q11.2 deletion (general features in aggregate) | Hooded upper eyelids, diminished supraorbital ridges, bulbous nose, short nasal bridge, cleft palate, micrognathia, retrognathia, hypospadias, ridging of metopic suture, brachycephaly, mild excessive nuchal skin, small palpebral fissures, downslanting palpebral fissures, cupped ear(s) with overfolded helices, ear anomalies (crumpled appearance, overfolding) posteriorly-rotated ears, thin upper lip, prominent nasolabial folds, displaced nipples, hypotonia, long/thin fingers                                       | Hypotonia, hypocalcemia, micrognathia, retrognathia                                          |
|             |              | 22q11.2 deletion/21q22.3 duplication (5Mb)       | Small palpebral fissures, small/underdeveloped nasal bridge, short sternum, overlapping digits                                                                                                                                                                                                                                                                                                                                                                                                                                      | IUGR, small bowel obstruction                                                                |
|             |              | 6p23.2-p25.1 deletion/9q34 duplication           | Long tapered digits, transverse palmar creases                                                                                                                                                                                                                                                                                                                                                                                                                                                                                      |                                                                                              |
|             |              | 16p11.2 deletion (general features in aggregate) | Upslanting palpebral fissures, flattened nasal bridge, posteriorly-rotated ears                                                                                                                                                                                                                                                                                                                                                                                                                                                     | Butterfly vertebrae, hemivertebrae, cystic kidney, unilateral renal agenesis, rib anomalies  |
|             |              | 1p36 deletion                                    | Intrauterine growth restriction, low posterior hairline, eyes slightly upslanting, eyes deep-set, mildly hypoplastic nasal root, prominent lateral nasal pillars, bulbous nose with hypoplastic alae nasi, long philtrum, mildly thin upper lip, very ridged and highly arched palate, small chin, ears mildly low set and posteriorly-rotated, thickened helices, excess nuchal skin, right single palmar crease, somewhat spatulated distal fingertips with hypoplastic nails also seen in her toes, mildly long fingers and toes |                                                                                              |
|             |              | Trisomy 13                                       | Midface hypoplasia                                                                                                                                                                                                                                                                                                                                                                                                                                                                                                                  | Microphthalmia, bilateral postaxial polydactyly, right-sided congenital diaphragmatic hernia |

|            |   |                                                                           |                                                                                                                                                                                                                                                             |                                                                                             |
|------------|---|---------------------------------------------------------------------------|-------------------------------------------------------------------------------------------------------------------------------------------------------------------------------------------------------------------------------------------------------------|---------------------------------------------------------------------------------------------|
|            |   | 20p12 deletion (Alagille syndrome)                                        | Slight facial asymmetry, slightly shortened right palpebral fissure, continuous horizontal palmar crease of the left hand                                                                                                                                   | Microcephaly, posterior embryotoxon (consistent with Alagille syndrome)                     |
|            |   | 39.31Mb 3p22.2-pter duplication/1.68 Mb deletion of 12q24.33-qter         |                                                                                                                                                                                                                                                             | Micropenis, bilateral cryptorchidism, micro-retrognathia                                    |
| Heterotaxy | 0 | None                                                                      | No notable dysmorphic features                                                                                                                                                                                                                              | Most had heterotaxy or laterality-spectrum malformations (e.g., situs anomalies)            |
| LVOTO      | 6 | 7q11.23 deletion (Williams syndrome)                                      | Broad forehead, bitemporal narrowing, periorbital fullness, epicanthal folds, mildly cupped ears, wide mouth, broad nasal tip                                                                                                                               | Microcephaly, small testes, right inguinal hernia                                           |
|            |   | 15q24.2-q24.3 duplication (2.2 Mb)                                        | Retrognathia, mildly recessed nasal bridge, first toes with fetal fat pads                                                                                                                                                                                  |                                                                                             |
|            |   | 16p11.2 deletion (x2)                                                     |                                                                                                                                                                                                                                                             | Butterfly vertebrae, hemivertebrae, cystic kidney, unilateral renal agenesis, rib anomalies |
|            |   | Mosaic trisomy 13                                                         | Capillary hemangiomas, overfolded ear helices, mildly short palpebral fissures, epicanthal folds, prominent nasal root and nasal bridge, hypoplastic alae nasi, mild micrognathia                                                                           | Non-osseous postaxial polydactyly                                                           |
| RVOTO      | 0 | Trisomy 13                                                                | Dysmorphic features (noted generally)                                                                                                                                                                                                                       |                                                                                             |
| Septal     | 4 | None                                                                      |                                                                                                                                                                                                                                                             |                                                                                             |
|            |   | 2q22.2-q22.3 deletion (including the ZEB2 gene c/w Mowat-Wilson syndrome) | Wide nasal bridge, short philtrum, ears with upturned/creased lobes BL, low-set ears, bridged palmar crease, clenched fists, mild-moderate abdominal distension                                                                                             |                                                                                             |
|            |   | 22q11.2 deletion                                                          | Subtle strabismus, small palpebral fissures, left ear with overfolded helix, low-set and cupped ears, thin upper lip                                                                                                                                        |                                                                                             |
|            |   | 22q11.2 deletion                                                          | Mild brachycephaly, mildly flat and asymmetrical occiput, downslanting palpebral fissures, prominent superior helices, posteriorly-rotated ears, short nasal bridge, long and thin fingers, 2-3 toe overlapping, possible 5 <sup>th</sup> toe camptodactyly | Mild generalized hypotonia                                                                  |
|            |   | Trisomy 18                                                                | Exam difficult due to intubation, facial features c/w trisomy 18                                                                                                                                                                                            | Small for age (IUGR), left diaphragmatic hernia, pontocerebellar hypoplasia                 |

---

APVR, anomalous pulmonary venous return; AVSD, atrioventricular septal defect; LVOTO, left ventricular outflow tract obstructive defect; RVOTO, right ventricular outflow tract obstructive defect

**Supplemental Table 3a.** Descriptive statistics for conotruncal subtype lesions

| Conotruncal Subtype Group | Conotruncal Subtype     | Number (n) | Proportion (%) |
|---------------------------|-------------------------|------------|----------------|
| Complex/Single Ventricle  | DILV                    | 1          | 0.77%          |
| DORV                      | DORV                    | 10         | 7.69%          |
|                           | DORV w/ LVOTO           | 1          | 0.77%          |
|                           | DORV w/ IAA (NOS)       | 1          | 0.77%          |
| IAA                       | IAA (NOS)               | 8          | 6.15%          |
|                           | IAA w/ LVOTO            | 1          | 0.77%          |
| TA                        | TA                      | 11         | 8.46%          |
|                           | TA w/ IAA (NOS)         | 1          | 0.77%          |
|                           | TA w/ LVOTO             | 1          | 0.77%          |
| D-TGA                     | D-TGA                   | 41         | 31.54%         |
|                           | D-TGA/DORV              | 9          | 6.92%          |
|                           | D-TGA/DORV w/ IAA (NOS) | 1          | 0.77%          |
|                           | D-TGA w/ IAA (NOS)      | 1          | 0.77%          |
|                           | D-TGA w/ LVOTO          | 2          | 1.54%          |
| TOF                       | TOF                     | 30         | 23.08%         |
|                           | TOF w/ PA               | 9          | 6.92%          |
|                           | TOF w/ DORV             | 1          | 0.77%          |
|                           | TOF w/ LVOTO            | 1          | 0.77%          |
| <b>Total</b>              |                         | <b>130</b> | <b>100%</b>    |

DILV = double-inlet left ventricle, DORV = double-outlet right ventricle, D-TGA = dextro-transposition of the great arteries, IAA (NOS) = interrupted aortic arch (type not otherwise specified), LVOTO = left ventricular outflow tract obstruction (accompanying the primary conotruncal defect), PA = pulmonary atresia, TOF = tetralogy of Fallot

**Supplemental Table 3b.** Conotruncal subtype lesions represented in patients with cytogenetic diagnoses

| Syndrome/Cytogenetic Disorder                                      | Conotruncal Lesions Subtype                       |
|--------------------------------------------------------------------|---------------------------------------------------|
| 22q11.2 deletion                                                   | DORV, IAA (NOS), IAA w/ LVOTO, TA, TOF, TOF w/ PA |
| 22q11.2 deletion/21q22.3 duplication (5 Mb)                        | DORV                                              |
| 6p23.3-p25.1 deletion/9q34 duplication                             | TOF                                               |
| 16p11.2 deletion                                                   | D-TGA, TOF                                        |
| 1p36 deletion                                                      | TOF                                               |
| Trisomy 13                                                         | DORV w/ LVOTO                                     |
| 20p12 deletion (Alagille syndrome)                                 | TOF                                               |
| 39.31 Mb 3p22.2-pter duplication/1.68 Mb deletion of 12q24.33-qter | DORV                                              |
| Xq28 deletion (BRCC3, familial moyamoya)                           | TOF                                               |

DILV = double-inlet left ventricle, DORV = double-outlet right ventricle, D-TGA = dextro-transposition of the great arteries, IAA (NOS) = interrupted aortic arch (type not otherwise specified), LVOTO = left ventricular outflow tract obstruction (accompanying the primary conotruncal defect), PA = pulmonary atresia, TOF = tetralogy of Fallot
